# Supplementary material for: Infant Visual Brain Development and Inherited Genetic Liability in Autism
Source: Atypon-hosted journal article supplement (doi:10.1176/appi.ajp.21101002), 2022-05-26
Supplement: appi.ajp.21101002.ds001.pdf [file appi.ajp.21101002.ds001.pdf]

## SUPPLEMENTARY METHODS

### Participants

All participants were screened and excluded based on the following criteria: known genetic conditions or syndromes in the proband or infant, medical/neurological conditions affecting growth, development, or cognition (e.g., vision or hearing loss), birth weight <2000g and/or gestational age <36 weeks or significant perinatal adversity and/or exposure to in utero neurotoxins, contraindication for MRI, predominant home language other than English, adopted children or half siblings, first-degree relative with psychosis, schizophrenia, or bipolar disorder screened using the Family Interview for Genetic Studies, and multiple gestation pregnancy.

Of the 414 participants who were followed to outcome at 24 months and received DSM diagnostic classifications, 14 participants were removed owing to missing proband behavioral data, four participants were removed due to meeting exclusion criteria after enrollment (identified genetic syndrome in the proband ( $n = 2$ ), medical complication identified in the proband prior to onset of ASD ( $n = 2$ )), and 12 participants were removed because they were biological siblings of another high-risk sibling in the cohort (i.e. more than one younger sibling was recruited from the same family). In the case of related high-risk siblings, the sibling with the most available data (neuroimaging data at 6, 12, and 24 months) was selected for inclusion in the study; the selection was made blinded to the diagnostic outcome of the child. A total of 384 proband-sibling pairs were included in the present study (**Table S1**), 89 of whom were concordant for a diagnosis of ASD, meaning the younger sibling received a diagnosis of ASD at 24 months of age.

### Imaging Procedures

The imaging protocol included a localizer scan, 3D T1 MPRAGE (TR = 2,400ms, TE = 3.16ms, 160 sagittal slices, FOV = 256mm, voxel size =  $1\text{mm}^3$ ), 3D T2 TSE (TR = 3,200ms, TE = 499ms, 160 sagittal slices, FOV = 256mm, voxel size =  $1\text{mm}^3$ ), and a 25-direction diffusion weighted imaging (DWI) sequence. The DWI sequence was an ep2d\_diff pulse sequence with a FOV of 190mm (6 and 12 months) or 206mm (24 months), 75-81 transversal slices, and voxel size of  $2\text{mm}^3$ , TR = 12,800-13,300ms, TE=102ms, with 26 DWI volumes with  $b$  values between 0 and  $1,000\text{s/mm}^2$  in increments of 40, including a single  $b = 0\text{s/mm}^2$ , and 25 gradient directions. The BOLD data were collected using gradient-echo echo planar image acquisition (TE = 27 ms; TR = 2500 ms; voxel size  $4 \times 4 \times 4 \text{mm}^3$ ). A minimum of two runs of 130 frames were required for inclusion. A number of quality control procedures were employed to assess scanner stability and reliability across sites, time, and procedures. Geometric phantoms were scanned monthly

and human phantoms (two adult subjects) were scanned annually to monitor scanner stability at each site across the study period. Details on the stability procedures and quality control checks are described elsewhere(1, 2). All scans underwent radiological review by a licensed neuroradiologist(1); no subjects included in this report had clinically significant abnormalities on any MRI at any age. MRI sample sizes by age are shown **Table S2**.

## **Image Analysis**

Image processing was performed to obtain global brain tissue volumes, global and regional cortical surface area measurements, extra-axial cerebrospinal fluid volumes, and tract-based measures of white matter integrity. All image processing and quality control was conducted blind to the subject diagnostic information.

Brain volumes were obtained using a framework of atlas-moderated expectation maximization including co-registration of multi-modal (T1/T2) MRI, bias correction, brain masking, noise reduction, and multivariate classification with the AutoSeg toolkit (<http://nitrc.org/projects/autoseg>)(3). Population average templates and corresponding probabilistic brain tissue priors for white matter (WM), gray matter (GM), and cerebrospinal fluid (CSF) were constructed for the 6 to 24-month-old brain. The brain measure of interest included in this study is total cerebral volume, defined as the combined GM and WM volume of the cerebrum, including a segment of the midbrain and brainstem.

Cortical surface area measurements for 12 and 24-month images were obtained via a CIVET workflow adapted for pediatric images and using an age-corrected automated anatomical labeling (AAL) atlas(4, 5). CIVET uses shrink-wrap deformable surface evolution of WM, local Laplacian distance and local surface area, mapping to a spherical domain, co-registration using cortical sulcal features and extraction of regional measurements through a deformably co-registered fine-scale lobar parcellation. Surface area is computed along the geometric mid-cortical surface. For 6-month data sets, measurements were extracted from surfaces propagated via deformable multi-modal, within-subject co-registration(5) of MRI data sets from the 12-month scan. For this study, we utilized total surface area (TSA) measurements and as well as surface area measurements in targeted regions of interest (ROIs). These ROIs included those shown in Hazlett et al.(1) to be hyper-expanding in infants who develop ASD: right middle frontal gyrus, bilateral cuneus, right lingual gyrus, bilateral middle occipital gyrus, and left inferior temporal gyrus. To speak to the specificity of findings, two bilateral control ROIs were selected a-priori to not overlap with any ROIs shown to have differential development in infants who do develop ASD versus those who do not, or any ROIs shown to contribute to a prediction of ASD (see Figures 2 and 3 from Hazlett et al.,(1)). Selected control ROIs were the bilateral precentral gyrus (frontal lobe) and bilateral supramarginal gyrus (parietal lobe). Surface area ROIs are depicted in **Figure 2** in the main text.

Extra-axial CSF (EA-CSF) volumes were generated from a multi-modal (T1/T2) pipeline involving distortion correction, mutual registration, transformation to stereotactic space, and CSF/brain tissue segmentation(6). All images were corrected for geometric distortions and

intensity non-uniformity(7). T2 images were then registered to T1 images using mutual information registrations(8), and both co-registered images were transformed to stereotactic space. The skull was removed using a majority voting approach between T1, T2 and T1/T2 brain masks using FSL Brain Extraction Tool (BET)(9). Visual quality control confirmed only skull was removed. All corrected and skull-stripped T1 and T2 images were input into tissue segmentation pipeline to obtain GM, WM, and CSF(10). A deformable registration was used to map each subject-specific image to two study-specific atlas templates (6 and 12-24 month), and the lateral, third and fourth ventricles and cisterns were masked in atlas space and propagated to subject space to isolate CSF in the subarachnoid space. A ventral boundary at the horizontal plane of the anterior-posterior commissure was defined and the volume of EA-CSF surrounding the dorsolateral convexities of the cortical surface was measured.

Diffusion weighted images (DWIs) were pre-processed for appropriate quality using DTI prep(11). Visual quality control was performed by expert raters to remove additional images with residual artifacts. Data sets containing fewer than 18 of 25 total (72%) gradient directions after this two-step procedure were excluded from further processing to ensure consistent signal-to-noise ratio. As described in Wolff et al., approximately 10.5% of all acquired DTI data sets were excluded following quality control(12). Tractography was performed using the UNC-Utah NAMI-MIC framework(13) ([www.nitrc.org/projects/namicdtifiber](http://www.nitrc.org/projects/namicdtifiber)) using a study-specific template in 3D Slicer ([www.slicer.org](http://www.slicer.org)). Fractional anisotropy (FA) values were computed and averaged across each fiber tract, and tract-average values from a-priori selected fibers (splenium, and control tracts ( genu, and body of the corpus callosum)) were used for analyses.

The functional MRI data were processed following methods described in previous IBIS publications(14, 15) using the 4dfp suite of tools (<http://4dfp.readthedocs.io>). Images were compensated for slice-dependent time shifts; head movement was quantified for spatial realignment both within and across runs; whole brain image intensity was normalized to a mode value of 1000(16); and images were registered into standardized 3-mm isotropic atlas space through an affine transformation. Processing for functional connectivity MRI applied global signal regression, nuisance signal regression, spatial and temporal bandpass filtering, and motion scrubbing(17). Motion scrubbing was implemented at a frame-to-frame displacement (FD) of 0.2 mm(18). To pass quality control, subjects must have a minimum of 6.25-minutes of scrubbed fcMRI; all infants included in this analysis provided a minimum of 7 minutes of scrubbed fcMRI (mean = 10.45min, SD = 2.5m).

The derivation and computation of time series data follow similar procedures as described previously for a primary set of 230 regions of interest (ROIs; 10-mm-diameter, spherical)(19), and ROI details are provided in the **Extended Data Table** (supplementary Excel file). In addition to the primary 230-ROI set, we generated (Hawks et al., under review) four new cerebellar ROIs by reverse-seeding frontoparietal and default mode networks(20–22). Functional connectivity values were calculated as Pearson correlations between pairs of ROI time-series and Fisher  $r$ -to- $Z$  transformed for analyses. The full set of 234 ROIs were sorted into functional networks by applying the Infomap community detection algorithm(23) at edge densities ranging

from 0.02 to 0.10 (steps of 0.01). An automated procedure was used to generate a single consensus model of network structure, and structure-specific thresholding was used to integrate subcortical and cerebellar ROIs into whole-brain networks(24). Unassigned ROIs ( $n = 4$ ) were excluded from network analyses. The network solution is shown below in **Figure S2**. Infant network nomenclature largely reflects naming of canonical networks found in adults; some network structures, however, appear to be specific to infants (e.g. pDMN was named as such because it contains the PCC, the adult DMN does not fracture into anterior and posterior components).

### Statistical Analysis

Pearson correlations and confidence intervals were computed between proband SCQ score and each sibling global phenotype of interest to generate interpretable effect sizes. Correlations were computed separately for HR infants who received a diagnosis of ASD (ASD group) and those who did not (non-ASD group) at each of the visit time points (6, 12, and 24 months).  $P$ -values were adjusted using false discovery rate (FDR)(25) within each sibling group (ASD vs non-ASD) separately for global (cerebral volume, total surface area, EA-CSF volumes) and regional phenotypes (regional surface area, white matter FA in fiber tracts of interest). Brain phenotypes shown to exhibit significant correlations with proband SCQ scores (for global phenotypes  $q < 0.05$ , for regional phenotypes  $P < 0.05$ ) were carried forward for further investigation. A slightly less strict selection was applied for regional phenotypes given the novelty of the study and a priori nature of the analysis.

Longitudinal mixed effects models for repeated measures were employed to analyze associations between proband SCQ score and sibling brain phenotypes from 6 to 24 months identified through Pearson correlation analyses above. Each brain phenotype was modeled separately, with a subject-specific intercept and slope. Fixed effects included proband SCQ score, sibling diagnosis, sibling age, sibling sex, and study site. Interaction terms between sibling diagnosis and proband SCQ score, and sibling diagnosis and age were also modeled. An unstructured covariance matrix was specified for the random effects while within-subject residuals were assumed to be independent. Mathematically, this model can be expressed as

$$Y_{ij} = \beta_0 + \beta_1 SCQ_{ij} + \beta_2 ASD_{ij} + \beta_3 Age_{ij} + \beta_4 Sex_{ij} + \beta_5 Site_{ij} + \beta_6 SCQ_{ij} * ASD_{ij} + \beta_7 Age_{ij} * ASD_{ij} + \varphi_{1i} + \varphi_{2i} * Age_{ij} + \varepsilon_{ij}$$

with  $i$  denoting subject and  $j$  denoting visit,  $\varphi$  denoting random effects,  $\varepsilon$  denoting residuals, and ASD, Sex, and Site being dummy-coded categorical variables. In secondary analyses, potential time-varying associations (e.g., splenium FA) were modeled with a three-way interaction term (proband SCQ score x sibling diagnosis x time). Model diagnostics were carried out visually to the primary models of interest by assessing the normalized conditional residuals for normality and homoscedasticity(26). Only one model was found to have non-normal residuals (total cerebral volume), this was mitigated by the large sample, resulting in asymptotically valid tests by the

central limit theorem(27). In sensitivity analyses, we included proband age and sex as covariates in our mixed models predicting brain phenotypes; we found that proband age and sex were not significant predictors of any sibling brain phenotype, consistent with our prior report finding no link between proband age and sex and sibling diagnostic outcomes or behavioral abilities(28), and thus the more parsimonious models (excluding proband age and sex) are reported.

To aid in the interpretation of effect size and visualization of data longitudinally, we dichotomized proband SCQ scores using a median split informed by evidence that proband SCQ scores in the upper quartiles conferred significantly increased risk for autism in infant siblings(28). For brain phenotypes significantly associated with proband SCQ score in mixed model analyses, least squares means were generated for the ASD group split by proband SCQ group (above vs. below the median SCQ; SCQ-High, SCQ-Low) and plotted across time. Percent differences in model-adjusted brain phenotypes at each time point and adjusted Cohen's *d* effect sizes were computed for ASD infants based on proband SCQ group. Additionally, to assess the generalizability of our results beyond a single parent report measure of ASD traits (SCQ), we also computed correlations using proband behavior derived from the Autism Diagnostic Interview-Revised (ADI-R), administered to a parent by a clinical expert(29). We tested two domain scores from the ADI-R with varying degrees of construct overlap and correlation with the proband SCQ: reciprocal social interaction (RSI;  $r_{331} = 0.56$ ,  $P < 0.0001$ ) and restricted and repetitive behaviors ( $r_{331} = 0.19$ ,  $P < 0.001$ ). Statistical analyses of structural and diffusion data were conducted using the R computing software, version 4.0.2 (2020).

Results from *a priori* analyses above led us to utilize our fcMRI data on a subset of our sample to test for associations between proband ASD traits and sibling functional connectivity at 6 months of age. Based on our other findings, we hypothesized that connections within and between visual networks would be associated with proband severity. If our hypotheses were correct, this would suggest multimodal anatomical and functional convergence on cortical regions, fiber pathways, and functional networks involved in visual processing. Rather than test visual circuitry directly, which could lead to confirmation bias, we conducted fcMRI enrichment analyses. Enrichment is a whole-brain approach (and therefore unbiased and data-driven) that identifies clusters of strong brain-behavior relationships within and between functional networks(14). Enrichment analyses were conducted using the 58 siblings ( $n = 13$  ASD) with available fcMRI data at 6 months of age. The fcMRI data set is smaller than the structural and diffusion data sets due to a later onset of data collection during the course of the study. Owing to the limited number of subjects with fcMRI data available at 6 months of age, enrichment analyses were conducted across the *combined* sample (i.e., ASD and non-ASD), as in our prior published fcMRI work(14). This approach aligns with findings that functional connectivity did not differentiate infants based on diagnosis in cohort of a similar size (30).

Enrichment analyses were performed separately with the proband SCQ, ADI-R RSI, and VABS Socialization (VABS-Soc) scores. The VABS-Soc provides a complementary measure of social behavior available for a subset of probands. We used all three proband scores as inputs to our data-driven enrichment analysis to increase the search space. Analyses proceeded in three

steps, improving upon our prior fcMRI publications(14, 31) by accounting for familywise error rate with respect to the number of network pairs tested. First, the strongest 5% of sibling brain-proband behavior associations (*hits*) were identified in real and shuffled outcome ( $n = 50,000$ ) data using mass univariate screening based on Spearman correlations. Second, for every network-network pair, enrichment P-values were computed as the fraction of shuffled runs with at least as many hits as real data. Based on simulations, it was determined that  $P$ -values  $< .001$  were necessary to maintain 5% experiment-wide false-positive rate. To avoid overlooking potentially informative results given the novelty of the method and application,  $P$ -values  $< .01$  were interpreted in the context of results from other imaging modalities. Python version 3.6.8 (2018) and MATLAB version 8.5 (2015a) were used to run enrichment analyses and generate figures.

### **Data Availability**

Raw neuroimaging and behavioral data for infants in this study are publicly available at the National Institutes of Mental Health Data Archive (<https://nda.nih.gov>) in collections 0019 and 2027. Statistical code used to generate structural and diffusion imaging results is available via Github at [https://github.com/kmdono02/Proband\\_Sibling\\_Brain\\_Imaging\\_Analysis](https://github.com/kmdono02/Proband_Sibling_Brain_Imaging_Analysis). Code for fcMRI enrichment analyses is available via Github at <https://github.com/CPD-Lab/ProbandEA>.

## SUPPLEMENTARY FIGURES AND TABLES

**FIGURE S1. Infant Functional Network Solution**

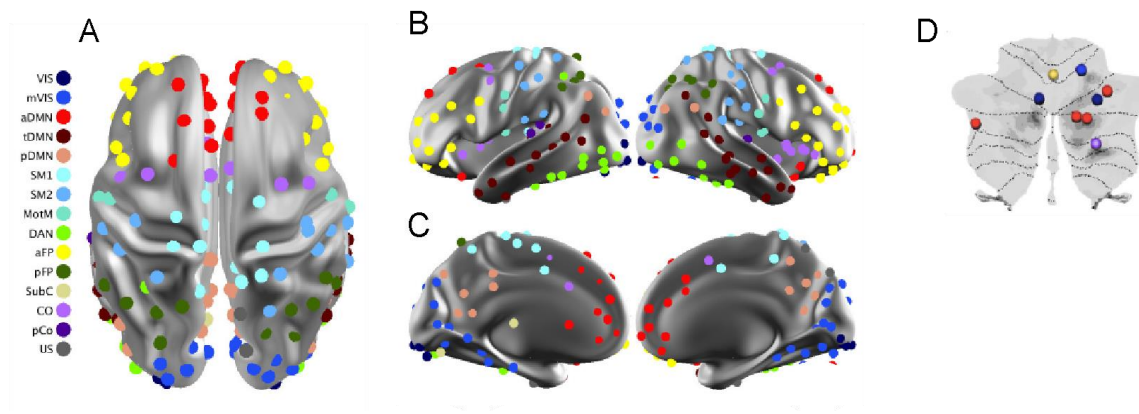

Infomap-derived functional networks are visualized on the (A) dorsal, (B) lateral, (C) medial, and (D) cerebellar surfaces. Network abbreviations are shown in (A): VIS = visual, mVIS = medial visual, aDMN = anterior default mode network, tDMN = temporal DMN, p = posterior DMN, SM1 = somato-motor 1, SM2 = somato-motor 2, MotM = mouth motor, DAN = dorsal attention network, aFP = anterior frontoparietal network, pFP = posterior FP, SubC = subcortical, CO = cingulo-opercular, pCO = posterior CO, US = unassigned

**FIGURE S2. Trajectories of Right Middle Occipital Surface Area Differ Among ASD Infants Based on Proband ASD Trait Level**

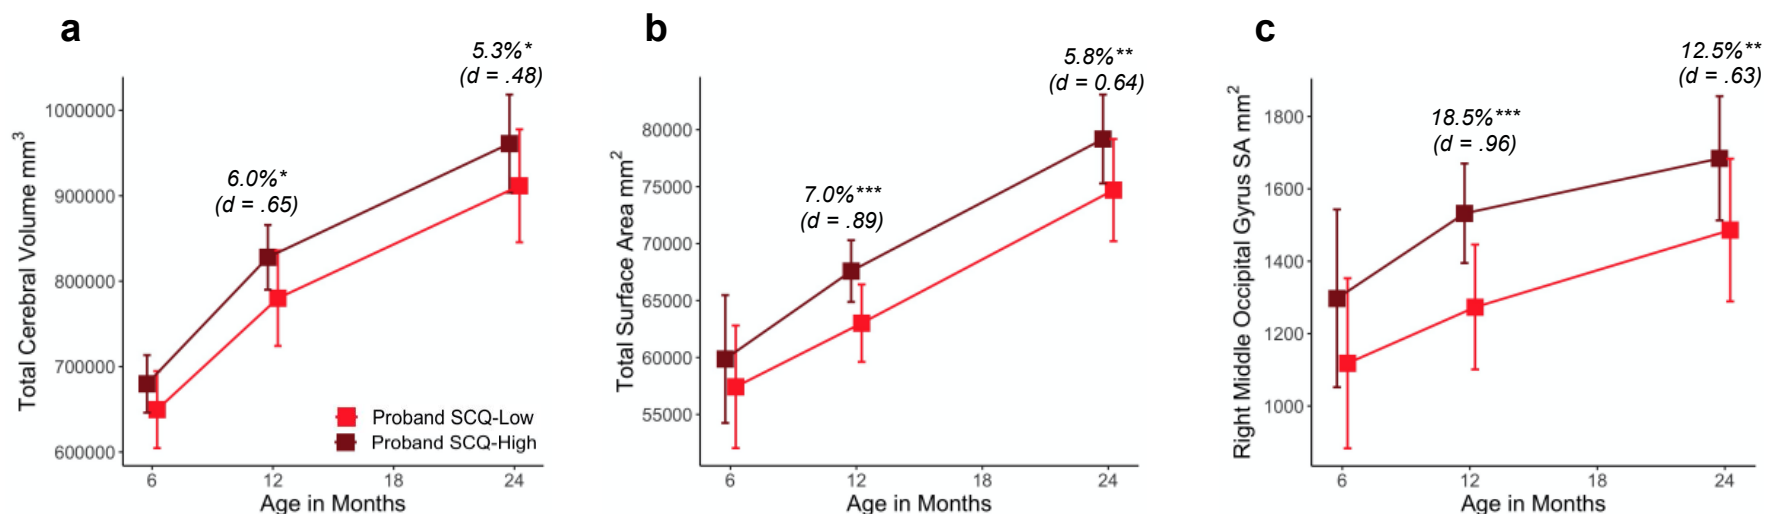

Least squares (LS) means of total cerebral volume, cortical surface area, and right middle occipital gyrus surface area (SA) are plotted at 6, 12, and 24 months for ASD siblings based on proband SCQ group (SCQ  $\geq$  21 = SCQ-High; SCQ < 21 = SCQ-Low). ASD siblings of probands with higher SCQ scores (SCQ-High) exhibited a 6.0% (Cohen's  $d = 0.65$ ) and 5.3% (Cohen's  $d = 0.48$ ) increase in model-adjusted total cerebral volume at 12 ( $F_{1,33} = 4.88$ ,  $P = 0.034$ ) and 24 months of age ( $F_{1,41} = 5.15$ ,  $P = 0.029$ ), respectively, compared to ASD siblings of probands with lower SCQ scores (SCQ-Low) (a). Similar increases were observed at 12 ( $F_{1,33} = 15.11$ ,  $P = 0.0005$ ) and 24 months ( $F_{1,40} = 7.80$ ,  $P = 0.008$ ) for total surface area (b). The greatest differences were observed in right middle occipital cortical surface area, with ASD siblings of SCQ-High probands exhibiting an 18.5% (Cohen's  $d = 0.96$ ) and 12.5% (Cohen's  $d = 0.63$ ) increase in regional surface area at 12 ( $F_{1,33} = 14.89$ ,  $P = 0.0005$ ) and 24 months ( $F_{1,40} = 7.77$ ,  $P = 0.008$ ), respectively (c). LS means are adjusted for proband and sibling age and sex. Percent differences between groups are reported where significant (\* $P < .05$ , \*\* $P < .01$ , \*\*\* $P < .001$ ) along with adjusted Cohen's  $d$  effect size estimates. Error bars represent 95% confidence intervals around LS means.



**FIGURE S3. Scatterplots of Proband SCQ Versus Sibling Regional Surface Area**

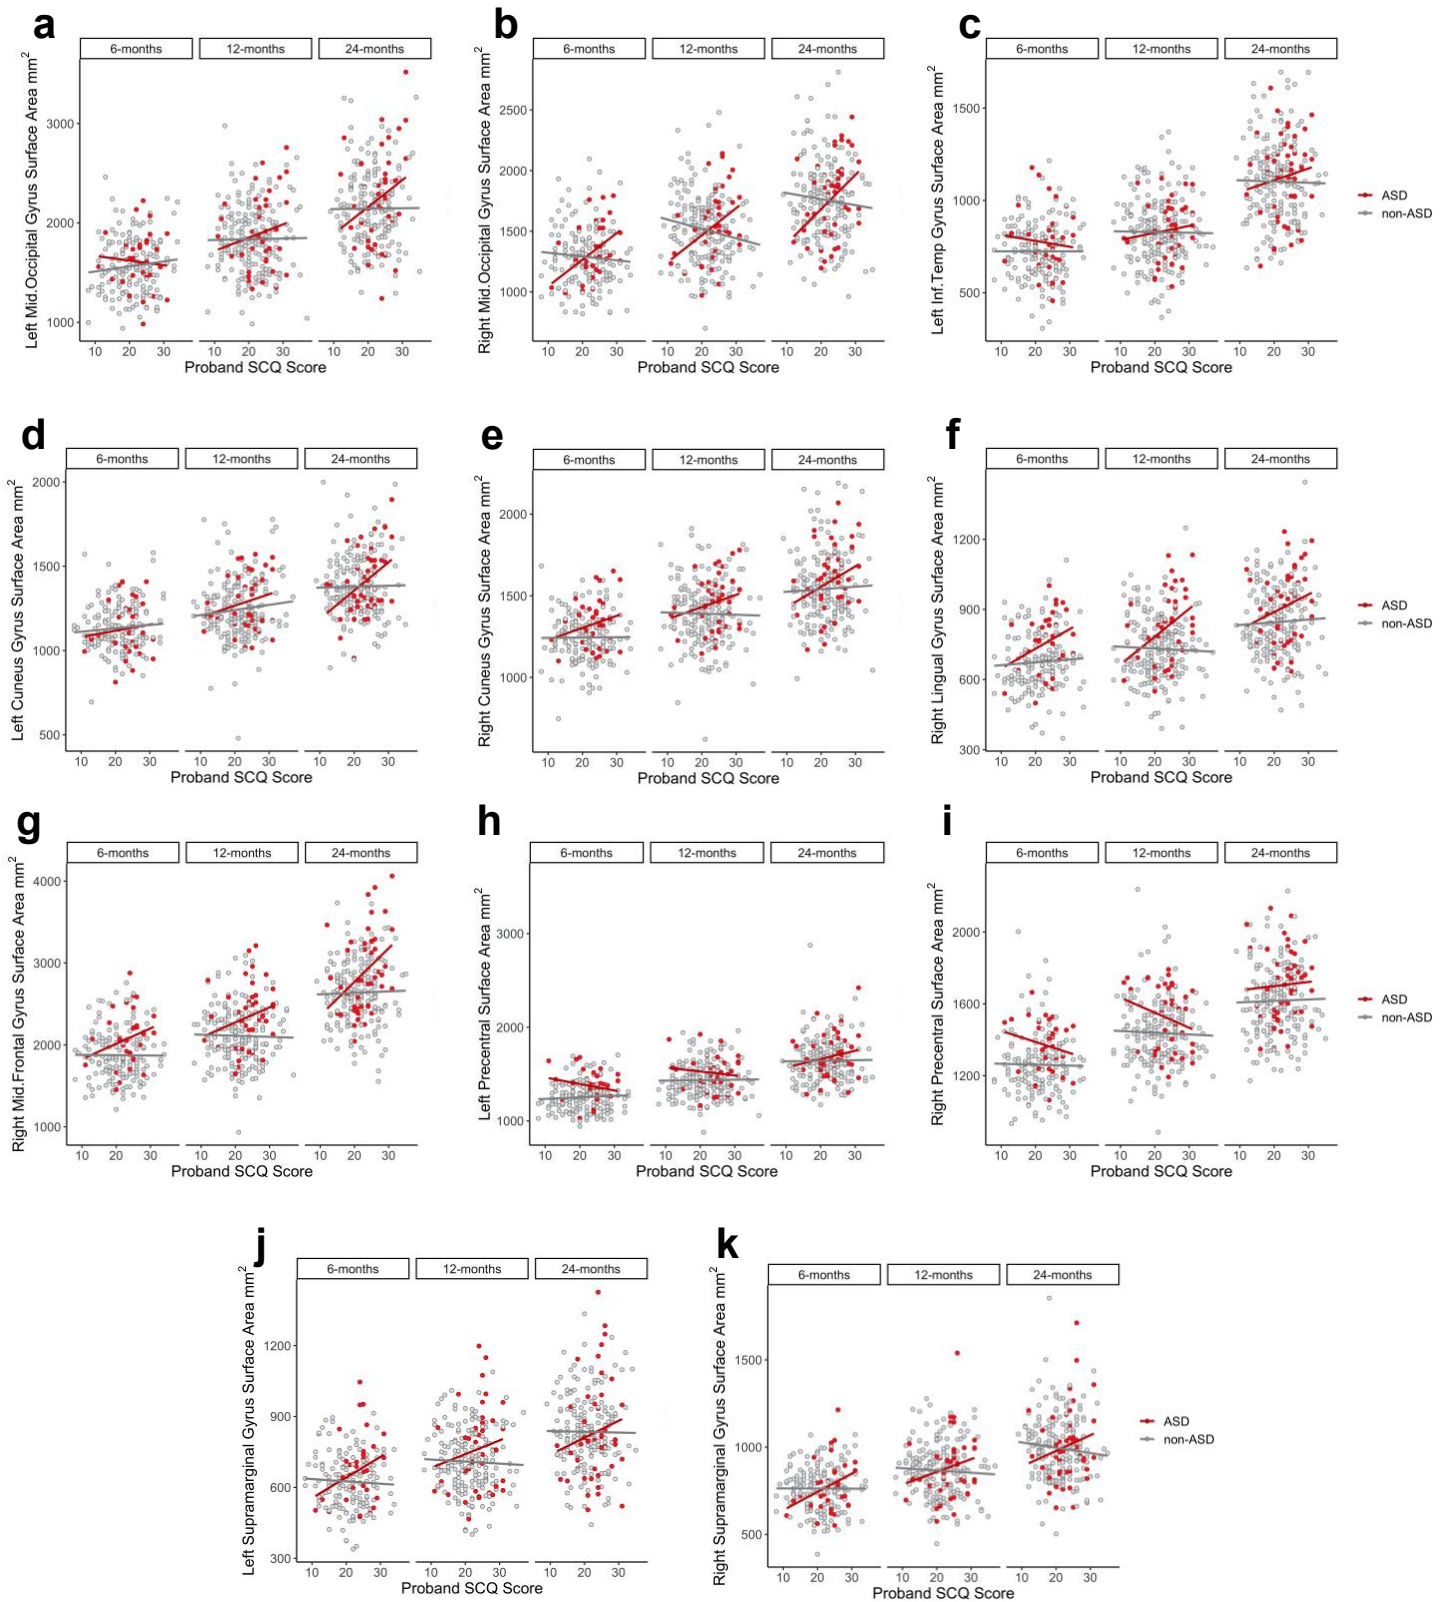

Scatterplots depicting bi-variate correlations between proband SCQ scores and sibling regional surface area measurements at 6, 12, and 24 months. Occipital regions of interest (a,b,d,e,f), additional hyper-expanding regions (c,g), and control regions (h-k) were investigated. Pearson correlation values by group and age are shown in Table S9. Visual depiction of correlations in brain space are depicted in Figure 2 in the main text.

**TABLE S1. Sample Demographics (N = 384 proband-sibling pairs)**

|                                        | Proband |      | ASD Siblings |      | Non-ASD Siblings |      | Group Comparison |     |                     |
|----------------------------------------|---------|------|--------------|------|------------------|------|------------------|-----|---------------------|
|                                        | n       | %    | n            | %    | n                | %    | X/t              | df  | p                   |
| <b>Sex</b>                             |         |      |              |      |                  |      | 14.46            | 1   | <0.001 <sup>a</sup> |
| Male (n,%)                             | 331     | 86.2 | 69           | 77.5 | 160              | 54.2 |                  |     |                     |
| Female (n,%)                           | 53      | 13.8 | 20           | 22.5 | 135              | 45.8 |                  |     |                     |
| <b>Child Race</b>                      |         |      |              |      |                  |      |                  |     | 0.568 <sup>b</sup>  |
| Asian (n,%)                            |         |      | 1            | 1.1  | 4                | 1.4  |                  |     |                     |
| Black (n,%)                            |         |      | 2            | 2.2  | 10               | 3.4  |                  |     |                     |
| More than one race (n,%)               |         |      | 13           | 14.6 | 26               | 8.8  |                  |     |                     |
| White (n,%)                            |         |      | 71           | 79.8 | 249              | 84.4 |                  |     |                     |
| Missing (n,%)                          |         |      | 2            | 2.2  | 6                | 2.0  |                  |     |                     |
| <b>Maternal Education</b>              |         |      |              |      |                  |      |                  |     | 0.34 <sup>b</sup>   |
| Less than college (n,%)                | 126     | 32.8 | 26           | 40.4 | 90               | 30.5 |                  |     |                     |
| College degree (n,%)                   | 145     | 37.8 | 27           | 30.3 | 118              | 40.0 |                  |     |                     |
| Graduate degree (n,%)                  | 94      | 24.5 | 23           | 25.8 | 71               | 24.1 |                  |     |                     |
| Not answered (n,%)                     | 4       | 1.0  | 0            | 0.0  | 4                | 1.4  |                  |     |                     |
| Missing (n,%)                          | 7       | 1.8  | 2            | 2.2  | 5                | 1.7  |                  |     |                     |
| <b>Autistic Traits</b>                 | mean    | SD   | mean         | SD   | mean             | SD   |                  |     |                     |
| Proband SCQ Score (mean, SD)           | 21.27   | 5.59 | 22.44        | 5.23 | 20.93            | 5.65 | -2.20            | 134 | 0.029 <sup>a</sup>  |
| Sibling ADOS Severity Score (mean, SD) |         |      | 5.86         | 1.88 | 1.61             | 0.99 | -20.43           | 102 | 0.001 <sup>a</sup>  |

<sup>a</sup>Testing for significant differences in distributions (Chi Square), or mean scores (t-tests) for ASD vs. non-ASD unless otherwise noted.

<sup>b</sup>Testing for significant differences in distributions using Fisher’s Exact Test for ASD vs non-ASD due to small counts

**TABLE S2. Count of Imaging Data Sets At Each Visit**

|                  | ASD | Non-ASD | Total |
|------------------|-----|---------|-------|
| <b>6 months</b>  |     |         |       |
| sMRI             | 52  | 186     | 238   |
| DTI              | 46  | 152     | 198   |
| fcMRI            | 13  | 45      | 58    |
| <b>12 months</b> |     |         |       |
| sMRI             | 44  | 209     | 253   |
| DTI              | 41  | 187     | 228   |
| <b>24 months</b> |     |         |       |
| sMRI             | 54  | 204     | 258   |
| DTI              | 48  | 176     | 224   |
| <i>Total</i>     | 298 | 1159    | 1457  |

**TABLE S3. Correlations Between Infant Brain Phenotypes and Proband ASD Trait Level**

|               | ASD |       |               |         |         | Non-ASD |       |               |         |         |
|---------------|-----|-------|---------------|---------|---------|---------|-------|---------------|---------|---------|
|               | n   | r     | 95% CI        | P value | q value | n       | r     | 95% CI        | P value | q value |
| <b>TSA</b>    |     |       |               |         |         |         |       |               |         |         |
| 6 months      | 33  | 0.28  | (-0.07, 0.57) | 0.115   | 0.173   | 153     | -0.02 | (-0.18, 0.14) | 0.8     | 0.845   |
| 12 months     | 39  | 0.40  | (0.1, 0.64)   | 0.011   | 0.045   | 194     | -0.08 | (-0.22, 0.06) | 0.246   | 0.845   |
| 24 months     | 46  | 0.41  | (0.14, 0.63)  | 0.004   | 0.036   | 181     | -0.04 | (-0.18, 0.11) | 0.633   | 0.845   |
| <b>TCV</b>    |     |       |               |         |         |         |       |               |         |         |
| 6 months      | 44  | 0.31  | (0.02, 0.56)  | 0.039   | 0.070   | 167     | -0.02 | (-0.17, 0.14) | 0.845   | 0.845   |
| 12 months     | 39  | 0.36  | (0.05, 0.61)  | 0.024   | 0.054   | 194     | -0.06 | (-0.2, 0.08)  | 0.43    | 0.845   |
| 24 months     | 48  | 0.35  | (0.07, 0.58)  | 0.015   | 0.045   | 186     | -0.04 | (-0.18, 0.11) | 0.635   | 0.845   |
| <b>EA-CSF</b> |     |       |               |         |         |         |       |               |         |         |
| 6 months      | 42  | -0.02 | (-0.32, 0.29) | 0.905   | 0.905   | 149     | -0.02 | (-0.18, 0.14) | 0.821   | 0.845   |
| 12 months     | 39  | 0.16  | (-0.16, 0.46) | 0.319   | 0.359   | 182     | -0.07 | (-0.21, 0.08) | 0.370   | 0.845   |
| 24 months     | 42  | 0.20  | (-0.11, 0.48) | 0.202   | 0.260   | 159     | -0.10 | (-0.25, 0.06) | 0.222   | 0.845   |

**TABLE S4. Correlations Between Infant Brain Phenotypes and Proband ADI-R Scores**

|                                                    | ASD |      |               |         |         | Non-ASD |       |                |         |         |
|----------------------------------------------------|-----|------|---------------|---------|---------|---------|-------|----------------|---------|---------|
|                                                    | n   | r    | 95% CI        | P value | q value | n       | r     | 95% CI         | P value | q value |
| <b>Proband Reciprocal Social Interaction</b>       |     |      |               |         |         |         |       |                |         |         |
| <b>TSA</b>                                         |     |      |               |         |         |         |       |                |         |         |
| 6 months                                           | 35  | 0.12 | (-0.23, 0.43) | 0.506   | 0.506   | 164     | -0.04 | (-0.19, 0.11)  | 0.599   | 0.756   |
| 12 months                                          | 42  | 0.47 | (0.19, 0.67)  | 0.002   | 0.012   | 205     | -0.05 | (-0.19, 0.08)  | 0.449   | 0.63    |
| 24 months                                          | 50  | 0.33 | (0.05, 0.55)  | 0.021   | 0.032   | 194     | -0.05 | (-0.19, 0.09)  | 0.495   | 0.756   |
| <b>TCV</b>                                         |     |      |               |         |         |         |       |                |         |         |
| 6 months                                           | 47  | 0.13 | (-0.17, 0.4)  | 0.4     | 0.48    | 181     | -0.04 | (-0.18, 0.11)  | 0.63    | 0.756   |
| 12 months                                          | 42  | 0.4  | (0.11, 0.63)  | 0.008   | 0.024   | 206     | -0.08 | (-0.21, 0.06)  | 0.274   | 0.63    |
| 24 months                                          | 52  | 0.33 | (0.06, 0.55)  | 0.016   | 0.032   | 200     | -0.07 | (-0.2, 0.07)   | 0.344   | 0.756   |
| <b>Proband Restricted and Repetitive Behaviors</b> |     |      |               |         |         |         |       |                |         |         |
| <b>TSA</b>                                         |     |      |               |         |         |         |       |                |         |         |
| 6 months                                           | 35  | 0    | (-0.33, 0.33) | 0.998   | 0.998   | 164     | -0.11 | (-0.26, 0.04)  | 0.154   | 0.185   |
| 12 months                                          | 42  | 0.17 | (-0.14, 0.45) | 0.283   | 0.849   | 205     | -0.07 | (-0.2, 0.07)   | 0.341   | 0.341   |
| 24 months                                          | 50  | 0.11 | (-0.18, 0.37) | 0.459   | 0.918   | 194     | -0.13 | (-0.26, 0.01)  | 0.077   | 0.115   |
| <b>TCV</b>                                         |     |      |               |         |         |         |       |                |         |         |
| 6 months                                           | 47  | 0.02 | (-0.27, 0.3)  | 0.915   | 0.998   | 181     | -0.17 | (-0.3, -0.02)  | 0.025   | 0.115   |
| 12 months                                          | 42  | 0.25 | (-0.06, 0.52) | 0.108   | 0.648   | 205     | -0.11 | (-0.24, 0.03)  | 0.112   | 0.168   |
| 24 months                                          | 52  | 0.05 | (-0.23, 0.32) | 0.736   | 0.998   | 200     | -0.15 | (-0.28, -0.01) | 0.039   | 0.115   |

**TABLE S5. Longitudinal Models Predicting Sibling Cerebral Volume and Surface Area From Proband ADI-R Scores**

|                                                   | Estimate <sup>a</sup> | 95% CI                 | df  | P value |
|---------------------------------------------------|-----------------------|------------------------|-----|---------|
| <b>Proband Reciprocal Social Interaction</b>      |                       |                        |     |         |
| <b>Cerebral Volume</b>                            |                       |                        |     |         |
| Intercept                                         | 777940.31             | (744283.11, 811597.51) | 400 | <0.001  |
| Proband ADI-R RSI                                 | -790.399              | (-2316.62, 735.82)     | 316 | 0.309   |
| Sibling Sex - Male                                | 74767.5               | (58857.28, 90677.72)   | 316 | <0.001  |
| Sibling Group - ASD                               | -69450.466            | (-137454.91, -1446.02) | 316 | 0.045   |
| Group x Proband ADI-R RSI                         | 4254.489              | (953.17, 7555.81)      | 316 | 0.012   |
| Group x Age MRI                                   | 348.287               | (-777.79, 1474.37)     | 400 | 0.544   |
| Site 2                                            | -10932.997            | (-33168.24, 11302.25)  | 316 | 0.334   |
| Site 3                                            | -13999.623            | (-34643.26, 6644.02)   | 316 | 0.183   |
| Site 4                                            | 5280.923              | (-16446.94, 27008.79)  | 316 | 0.633   |
| Sibling Age at MRI                                | 6544.691              | (6050.51, 7038.87)     | 400 | <0.001  |
| <b>Surface Area</b>                               |                       |                        |     |         |
| Intercept                                         | 56969.744             | (54871.26, 59068.23)   | 394 | <0.001  |
| Proband ADI-R RSI                                 | -55.515               | (-150.83, 39.8)        | 286 | 0.253   |
| Sibling Sex - Male                                | 4420.154              | (3406.51, 5433.79)     | 286 | <0.001  |
| Sibling Group - ASD                               | -4154.553             | (-8512.05, 202.94)     | 286 | 0.062   |
| Group x Proband ADI-R RSI                         | 261.752               | (48.92, 474.58)        | 286 | 0.016   |
| Group x Age MRI                                   | 13.098                | (-38.63, 64.83)        | 394 | 0.619   |
| Site 2                                            | 312.27                | (-1130.57, 1755.11)    | 286 | 0.67    |
| Site 3                                            | -457.549              | (-1801.99, 886.89)     | 286 | 0.503   |
| Site 4                                            | 249.303               | (-1153.5, 1652.11)     | 286 | 0.727   |
| Sibling Age at MRI                                | 1055.839              | (1033.2, 1078.48)      | 394 | <0.001  |
| <b>Proband Restricted and Repetitive Behavior</b> |                       |                        |     |         |
| <b>Cerebral Volume</b>                            |                       |                        |     |         |
| Intercept                                         | 787837.842            | (758121.78, 817553.9)  | 400 | <0.001  |
| Proband ADI-R RRB                                 | -3512.415             | (-6864.84, -159.99)    | 316 | 0.04    |
| Sibling Sex - Male                                | 75580.986             | (59613.16, 91548.82)   | 316 | <0.001  |
| Sibling Group - ASD                               | -30043.183            | (-82778.62, 22692.26)  | 316 | 0.263   |
| Group x Proband ADI-R RRB                         | 6973.762              | (-819.06, 14766.59)    | 316 | 0.079   |
| Group x Age MRI                                   | 291.789               | (-832.65, 1416.22)     | 400 | 0.61    |
| Site 2                                            | -13240.078            | (-35524.47, 9044.31)   | 316 | 0.243   |
| Site 3                                            | -15286.97             | (-35761.77, 5187.83)   | 316 | 0.143   |
| Site 4                                            | -771.366              | (-22939.1, 21396.37)   | 316 | 0.945   |
| Sibling Age at MRI                                | 6563.688              | (6070.27, 7057.1)      | 400 | <0.001  |
| <b>Surface Area</b>                               |                       |                        |     |         |
| Intercept                                         | 56708.523             | (54833.17, 58583.88)   | 394 | <0.001  |
| Proband ADI-R RRB                                 | -106.659              | (-319, 105.68)         | 286 | 0.324   |
| Sibling Sex - Male                                | 4531.589              | (3509.47, 5553.71)     | 286 | <0.001  |
| Sibling Group - ASD                               | -835.451              | (-4301.89, 2630.99)    | 286 | 0.636   |
| Group x Proband ADI-R RRB                         | 283.38                | (-226.14, 792.9)       | 286 | 0.275   |
| Group x Age MRI                                   | 11.51                 | (-40.5, 63.52)         | 394 | 0.664   |
| Site 2                                            | 175.335               | (-1275.5, 1626.17)     | 286 | 0.812   |
| Site 3                                            | -624.571              | (-1966.34, 717.2)      | 286 | 0.36    |
| Site 4                                            | -34.004               | (-1470.13, 1402.12)    | 286 | 0.963   |
| Sibling Age at MRI                                | 1055.926              | (1033.15, 1078.71)     | 394 | <0.001  |

<sup>a</sup>Reference groups for sex and sibling diagnostic group are female and non-ASD, respectively.

**TABLE S6. Linear Mixed Model Results for Total Cerebral Volume and Surface Area Controlling for Younger Sibling's ADOS Calibrated Severity Score**

|                              | Estimate | 95% CI                | df  | P value |
|------------------------------|----------|-----------------------|-----|---------|
| <b>Cerebral Volume Model</b> |          |                       |     |         |
| Intercept                    | 752991.7 | (729162, 776821.44)   | 368 | <0.001  |
| Proband SCQ                  | -974.033 | (-2520.46, 572.39)    | 287 | 0.216   |
| Sibling Sex - Male           | 74593.52 | (57883.06, 91303.98)  | 287 | <0.001  |
| Sibling Group - ASD          | -20519.9 | (-57211.24, 16171.46) | 287 | 0.272   |
| Group x Proband SCQ          | 6310.207 | (2464.03, 10156.38)   | 287 | 0.001   |
| Group x Age MRI              | 273.427  | (-895.18, 1442.04)    | 368 | 0.646   |
| ADOS CSS (24 Months)         | 5701.471 | (-951.05, 12353.99)   | 287 | 0.093   |
| Site 2                       | -13665.8 | (-37391.59, 10060.03) | 287 | 0.258   |
| Site 3                       | -8789.34 | (-30542.83, 12964.15) | 287 | 0.427   |
| Site 4                       | 4253.309 | (-18955.03, 27461.65) | 287 | 0.719   |
| Sibling Age at MRI           | 6507.459 | (5987.99, 7026.93)    | 368 | <0.001  |
| <b>Surface Area Model</b>    |          |                       |     |         |
| Intercept                    | 55315.7  | (53824.63, 56806.78)  | 363 | <0.001  |
| Proband SCQ                  | -69.993  | (-164.5, 24.52)       | 262 | 0.146   |
| Sibling Sex - Male           | 4588.613 | (3541.47, 5635.76)    | 262 | <0.001  |
| Sibling Group - ASD          | -1337.5  | (-3622.45, 947.45)    | 262 | 0.25    |
| Group x Proband SCQ          | 385.244  | (119.58, 650.91)      | 262 | 0.005   |
| Group x Age MRI              | 8.085    | (-46.9, 63.07)        | 363 | 0.773   |
| ADOS CSS (24 Months)         | 384.316  | (-43.18, 811.81)      | 262 | 0.078   |
| Site 2                       | 51.862   | (-1444.71, 1548.43)   | 262 | 0.946   |
| Site 3                       | -502.38  | (-1886.32, 881.56)    | 262 | 0.475   |
| Site 4                       | 109.269  | (-1355.16, 1573.7)    | 262 | 0.883   |
| Sibling Age at MRI           | 1057.301 | (1033.11, 1081.49)    | 363 | <0.001  |

**TABLE S7. Linear Mixed Model Results for Regional Brain Phenotypes Controlling for Younger Sibling’s ADOS Calibrated Severity Score**

|                                     | <b>Estimate</b> | <b>95% CI</b>      | <b>df</b> | <b>P value</b> |
|-------------------------------------|-----------------|--------------------|-----------|----------------|
| <b>Right Middle Frontal Gyrus</b>   |                 |                    |           |                |
| Intercept                           | 1701.723        | (1584.22, 1819.22) | 363       | <0.001         |
| Proband SCQ                         | -2.907          | (-10.32, 4.51)     | 262       | 0.441          |
| Sibling Sex - Male                  | 196.737         | (114.27, 279.21)   | 262       | <0.001         |
| Sibling Group - ASD                 | 88.273          | (-91.3, 267.84)    | 262       | 0.334          |
| Group x Proband SCQ                 | 18.939          | (-1.85, 39.73)     | 262       | 0.074          |
| Group x Age MRI                     | 3.964           | (-0.81, 8.74)      | 363       | 0.104          |
| ADOS CSS (24 Months)                | -1.941          | (-35.42, 31.54)    | 262       | 0.909          |
| Site 2                              | -10.257         | (-128.09, 107.57)  | 262       | 0.864          |
| Site 3                              | 41.263          | (-67.83, 150.35)   | 262       | 0.457          |
| Site 4                              | 26.804          | (-88.56, 142.17)   | 262       | 0.648          |
| Sibling Age at MRI                  | 43.718          | (41.63, 45.81)     | 363       | <0.001         |
| <b>Left Cuneus</b>                  |                 |                    |           |                |
| Intercept                           | 1095.73         | (1039.75, 1151.71) | 363       | <0.001         |
| Proband SCQ                         | 1.955           | (-1.58, 5.49)      | 262       | 0.278          |
| Sibling Sex - Male                  | 86.24           | (46.93, 125.55)    | 262       | <0.001         |
| Sibling Group - ASD                 | 0.97            | (-84.5, 86.43)     | 262       | 0.982          |
| Group x Proband SCQ                 | 6.619           | (-3.29, 16.52)     | 262       | 0.189          |
| Group x Age MRI                     | 0.405           | (-1.55, 2.36)      | 363       | 0.684          |
| ADOS CSS (24 Months)                | -5.692          | (-21.67, 10.28)    | 262       | 0.484          |
| Site 2                              | 26.369          | (-29.84, 82.57)    | 262       | 0.356          |
| Site 3                              | -11.16          | (-63.17, 40.85)    | 262       | 0.673          |
| Site 4                              | 13.319          | (-41.71, 68.35)    | 262       | 0.634          |
| Sibling Age at MRI                  | 13.264          | (12.41, 14.12)     | 363       | <0.001         |
| <b>Right Lingual Gyrus</b>          |                 |                    |           |                |
| Intercept                           | 634.155         | (586.89, 681.42)   | 363       | <0.001         |
| Proband SCQ                         | -0.695          | (-3.68, 2.29)      | 262       | 0.647          |
| Sibling Sex - Male                  | 57.235          | (24.11, 90.36)     | 262       | <0.001         |
| Sibling Group - ASD                 | 36.509          | (-35.9, 108.91)    | 262       | 0.322          |
| Group x Proband SCQ                 | 10.842          | (2.5, 19.18)       | 262       | 0.011          |
| Group x Age MRI                     | -0.605          | (-2.4, 1.19)       | 363       | 0.507          |
| ADOS CSS (24 Months)                | 4.49            | (-8.95, 17.93)     | 262       | 0.511          |
| Site 2                              | -0.823          | (-48.17, 46.53)    | 262       | 0.973          |
| Site 3                              | 10.376          | (-33.43, 54.18)    | 262       | 0.641          |
| Site 4                              | 12.593          | (-33.75, 58.93)    | 262       | 0.593          |
| Sibling Age at MRI                  | 8.67            | (7.89, 9.45)       | 363       | <0.001         |
| <b>Right Middle Occipital Gyrus</b> |                 |                    |           |                |
| Intercept                           | 1215.897        | (1127.32, 1304.47) | 363       | <0.001         |
| Proband SCQ                         | -6.359          | (-11.96, -0.76)    | 262       | 0.026          |
| Sibling Sex - Male                  | 143.353         | (81.16, 205.54)    | 262       | <0.001         |
| Sibling Group - ASD                 | -73.421         | (-208.96, 62.12)   | 262       | 0.287          |
| Group x Proband SCQ                 | 26.69           | (10.94, 42.44)     | 262       | <0.001         |
| Group x Age MRI                     | 0.12            | (-3.26, 3.5)       | 363       | 0.945          |
| ADOS CSS (24 Months)                | 3.764           | (-21.6, 29.13)     | 262       | 0.77           |
| Site 2                              | 7.244           | (-81.63, 96.12)    | 262       | 0.873          |

|                    |         |                 |     |        |
|--------------------|---------|-----------------|-----|--------|
| Site 3             | -9.044  | (-91.3, 73.22)  | 262 | 0.829  |
| Site 4             | -11.659 | (-98.72, 75.41) | 262 | 0.792  |
| Sibling Age at MRI | 25.2    | (23.71, 26.69)  | 363 | <0.001 |

**TABLE S8. Linear Mixed Model Results Including Time Interaction Term for Splenium FA Controlling for Younger Sibling's ADOS Calibrated Severity Score**

|                       | Estimate | 95% CI               | df  | P value |
|-----------------------|----------|----------------------|-----|---------|
| <b>CC Splenium</b>    |          |                      |     |         |
| Intercept             | 0.46643  | (0.4554, 0.47746)    | 291 | <0.001  |
| Proband SCQ           | 0.00016  | (-0.00069, 0.00101)  | 275 | 0.708   |
| Sibling Sex - Male    | 0.00434  | (-0.00336, 0.01203)  | 275 | 0.268   |
| Sibling Group - ASD   | -0.01536 | (-0.03318, 0.00246)  | 275 | 0.091   |
| Group x Proband SCQ   | 0.00174  | (-0.00038, 0.00386)  | 275 | 0.107   |
| Group x Age MRI       | 0.00023  | (-0.00054, 0.00099)  | 291 | 0.563   |
| Proband SCQ x Age MRI | 0.00003  | (-0.00003, 0.00009)  | 291 | 0.32    |
| Group x SCQ x Age MRI | -0.00014 | (-0.00029, 0)        | 291 | 0.058   |
| ADOS CSS (24 Months)  | 0.00103  | (-0.00202, 0.00408)  | 275 | 0.508   |
| Site - 2              | -0.00044 | (-0.01146, 0.01057)  | 275 | 0.937   |
| Site - 3              | -0.01733 | (-0.02725, -0.00742) | 275 | <0.001  |
| Site - 4              | 0.00148  | (-0.00889, 0.01184)  | 275 | 0.779   |
| Sibling Age at MRI    | 0.00415  | (0.00383, 0.00447)   | 291 | <0.001  |

**TABLE S9. Correlations Between Regional Infant Brain Phenotypes and Proband ASD Trait Level**

|                                             | ASD |       |               |       |       | Non-ASD |       |               |       |   |
|---------------------------------------------|-----|-------|---------------|-------|-------|---------|-------|---------------|-------|---|
|                                             | n   | r     | 95% CI        | P     | q     | n       | r     | 95% CI        | P     | q |
| <b>Left Precentral Gyrus (Control ROI)</b>  |     |       |               |       |       |         |       |               |       |   |
| 6 months                                    | 33  | -0.2  | (-0.51, 0.15) | 0.263 | 0.413 | 153     | 0.06  | (-0.1, 0.22)  | 0.466 | 1 |
| 12 months                                   | 39  | -0.12 | (-0.42, 0.2)  | 0.458 | 0.568 | 194     | 0.02  | (-0.13, 0.16) | 0.826 | 1 |
| 24 months                                   | 46  | 0.18  | (-0.12, 0.44) | 0.244 | 0.41  | 181     | 0.01  | (-0.13, 0.16) | 0.854 | 1 |
| <b>Right Precentral Gyrus (Control ROI)</b> |     |       |               |       |       |         |       |               |       |   |
| 6 months                                    | 33  | -0.2  | (-0.51, 0.16) | 0.274 | 0.413 | 153     | -0.02 | (-0.18, 0.14) | 0.827 | 1 |
| 12 months                                   | 39  | -0.23 | (-0.51, 0.09) | 0.153 | 0.36  | 194     | -0.03 | (-0.17, 0.11) | 0.659 | 1 |
| 24 months                                   | 46  | 0.05  | (-0.24, 0.34) | 0.729 | 0.765 | 181     | 0.02  | (-0.12, 0.17) | 0.765 | 1 |
| <b>Right Middle Frontal Gyrus</b>           |     |       |               |       |       |         |       |               |       |   |
| 6 months                                    | 33  | 0.26  | (-0.09, 0.55) | 0.146 | 0.36  | 153     | -0.01 | (-0.17, 0.15) | 0.931 | 1 |
| 12 months                                   | 39  | 0.23  | (-0.09, 0.51) | 0.163 | 0.36  | 194     | -0.02 | (-0.16, 0.12) | 0.748 | 1 |
| 24 months                                   | 46  | 0.38  | (0.1, 0.6)    | 0.01  | 0.084 | 181     | 0.02  | (-0.12, 0.17) | 0.743 | 1 |
| <b>Left Cuneus</b>                          |     |       |               |       |       |         |       |               |       |   |
| 6 months                                    | 33  | 0.11  | (-0.24, 0.44) | 0.542 | 0.65  | 153     | 0.08  | (-0.08, 0.24) | 0.328 | 1 |
| 12 months                                   | 39  | 0.2   | (-0.12, 0.49) | 0.216 | 0.405 | 194     | 0.11  | (-0.04, 0.24) | 0.141 | 1 |
| 24 months                                   | 46  | 0.4   | (0.12, 0.62)  | 0.006 | 0.084 | 181     | 0.02  | (-0.13, 0.16) | 0.831 | 1 |
| <b>Right Cuneus</b>                         |     |       |               |       |       |         |       |               |       |   |
| 6 months                                    | 33  | 0.22  | (-0.14, 0.52) | 0.222 | 0.405 | 153     | 0.01  | (-0.15, 0.17) | 0.929 | 1 |
| 12 months                                   | 39  | 0.22  | (-0.1, 0.5)   | 0.173 | 0.363 | 194     | -0.02 | (-0.16, 0.12) | 0.766 | 1 |
| 24 months                                   | 46  | 0.27  | (-0.02, 0.52) | 0.069 | 0.266 | 181     | 0.04  | (-0.11, 0.18) | 0.605 | 1 |
| <b>Right Lingual Gyrus</b>                  |     |       |               |       |       |         |       |               |       |   |
| 6 months                                    | 33  | 0.3   | (-0.04, 0.59) | 0.086 | 0.278 | 153     | 0.06  | (-0.1, 0.21)  | 0.491 | 1 |
| 12 months                                   | 39  | 0.38  | (0.07, 0.62)  | 0.017 | 0.102 | 194     | -0.03 | (-0.17, 0.11) | 0.633 | 1 |
| 24 months                                   | 46  | 0.21  | (-0.08, 0.47) | 0.159 | 0.36  | 181     | 0.04  | (-0.11, 0.19) | 0.58  | 1 |
| <b>Left Middle Occipital Gyrus</b>          |     |       |               |       |       |         |       |               |       |   |
| 6 months                                    | 33  | -0.07 | (-0.41, 0.28) | 0.683 | 0.736 | 153     | 0.1   | (-0.06, 0.26) | 0.212 | 1 |
| 12 months                                   | 39  | 0.18  | (-0.14, 0.47) | 0.275 | 0.413 | 194     | 0.01  | (-0.13, 0.15) | 0.857 | 1 |
| 24 months                                   | 46  | 0.26  | (-0.03, 0.52) | 0.076 | 0.266 | 181     | 0.01  | (-0.14, 0.15) | 0.936 | 1 |



|                                                |    |       |               |       |       |     |       |               |       |   |
|------------------------------------------------|----|-------|---------------|-------|-------|-----|-------|---------------|-------|---|
| <b>Right Middle Occipital Gyrus</b>            |    |       |               |       |       |     |       |               |       |   |
| 6 months                                       | 33 | 0.44  | (0.11, 0.68)  | 0.01  | 0.084 | 153 | -0.07 | (-0.23, 0.09) | 0.373 | 1 |
| 12 months                                      | 39 | 0.38  | (0.07, 0.62)  | 0.017 | 0.102 | 194 | -0.16 | (-0.3, -0.02) | 0.024 | 1 |
| 24 months                                      | 46 | 0.39  | (0.11, 0.61)  | 0.007 | 0.084 | 181 | -0.08 | (-0.22, 0.06) | 0.274 | 1 |
| <b>Left Supramarginal gyrus (Control ROI)</b>  |    |       |               |       |       |     |       |               |       |   |
| 6 months                                       | 33 | 0.27  | (-0.08, 0.56) | 0.133 | 0.36  | 153 | -0.05 | (-0.21, 0.11) | 0.546 | 1 |
| 12 months                                      | 39 | 0.16  | (-0.16, 0.45) | 0.329 | 0.461 | 194 | -0.04 | (-0.18, 0.1)  | 0.594 | 1 |
| 24 months                                      | 46 | 0.15  | (-0.15, 0.42) | 0.316 | 0.458 | 181 | -0.01 | (-0.16, 0.13) | 0.882 | 1 |
| <b>Right Supramarginal gyrus (Control ROI)</b> |    |       |               |       |       |     |       |               |       |   |
| 6 months                                       | 33 | 0.32  | (-0.03, 0.6)  | 0.07  | 0.266 | 153 | 0     | (-0.16, 0.15) | 0.961 | 1 |
| 12 months                                      | 39 | 0.19  | (-0.13, 0.48) | 0.239 | 0.41  | 194 | -0.05 | (-0.19, 0.09) | 0.486 | 1 |
| 24 months                                      | 46 | 0.19  | (-0.1, 0.46)  | 0.2   | 0.4   | 181 | -0.09 | (-0.23, 0.06) | 0.239 | 1 |
| <b>Left inferior temporal gyrus</b>            |    |       |               |       |       |     |       |               |       |   |
| 6 months                                       | 33 | -0.08 | (-0.41, 0.27) | 0.644 | 0.712 | 153 | 0     | (-0.16, 0.16) | 1     | 1 |
| 12 months                                      | 39 | 0.12  | (-0.2, 0.42)  | 0.46  | 0.568 | 194 | -0.01 | (-0.15, 0.13) | 0.869 | 1 |
| 24 months                                      | 46 | 0.13  | (-0.17, 0.4)  | 0.402 | 0.528 | 181 | -0.02 | (-0.16, 0.13) | 0.832 | 1 |
| <b>CC Splenium</b>                             |    |       |               |       |       |     |       |               |       |   |
| 6 months                                       | 42 | 0.45  | (0.17, 0.66)  | 0.003 | 0.084 | 137 | -0.02 | (-0.19, 0.15) | 0.826 | 1 |
| 12 months                                      | 36 | -0.09 | (-0.4, 0.25)  | 0.616 | 0.699 | 172 | 0.03  | (-0.12, 0.18) | 0.657 | 1 |
| 24 months                                      | 40 | 0.09  | (-0.23, 0.39) | 0.581 | 0.678 | 160 | 0.04  | (-0.12, 0.19) | 0.637 | 1 |
| <b>CC Genu</b>                                 |    |       |               |       |       |     |       |               |       |   |
| 6 months                                       | 42 | 0.29  | (-0.01, 0.55) | 0.059 | 0.266 | 137 | 0     | (-0.16, 0.17) | 0.959 | 1 |
| 12 months                                      | 36 | 0.15  | (-0.19, 0.45) | 0.387 | 0.524 | 172 | 0.06  | (-0.09, 0.2)  | 0.468 | 1 |
| 24 months                                      | 40 | 0.27  | (-0.05, 0.53) | 0.096 | 0.288 | 159 | 0.08  | (-0.07, 0.23) | 0.302 | 1 |
| <b>CC Body</b>                                 |    |       |               |       |       |     |       |               |       |   |
| 6 months                                       | 42 | 0.29  | (-0.01, 0.55) | 0.06  | 0.266 | 137 | 0     | (-0.17, 0.17) | 0.999 | 1 |
| 12 months                                      | 36 | 0.05  | (-0.29, 0.37) | 0.789 | 0.789 | 172 | 0.02  | (-0.13, 0.16) | 0.842 | 1 |
| 24 months                                      | 40 | 0.05  | (-0.26, 0.36) | 0.754 | 0.772 | 160 | 0     | (-0.16, 0.15) | 0.982 | 1 |

**TABLE S10. Linear Mixed Model Results for Regional Brain Phenotypes**

|                                     | Estimate | 95% CI             | df  | P value <sup>a</sup> |
|-------------------------------------|----------|--------------------|-----|----------------------|
| <b>Right Middle Frontal Gyrus</b>   |          |                    |     |                      |
| Intercept                           | 1697.077 | (1598.56, 1795.59) | 369 | <0.001               |
| Proband SCQ                         | -2.857   | (-10.2, 4.49)      | 267 | 0.444                |
| Sibling Sex - Male                  | 198.675  | (117.6, 279.75)    | 267 | <0.001               |
| Sibling Group - ASD                 | 81.229   | (-28.22, 190.68)   | 267 | 0.145                |
| Group x Proband SCQ                 | 18.777   | (-1.84, 39.39)     | 267 | 0.074                |
| Group x Age at MRI                  | 4.029    | (-0.71, 8.77)      | 369 | 0.096                |
| Site - 2                            | -9.572   | (-125.88, 106.73)  | 267 | 0.871                |
| Site - 3                            | 36.647   | (-70.3, 143.6)     | 267 | 0.5                  |
| Site - 4                            | 27.212   | (-86.95, 141.37)   | 267 | 0.639                |
| Sibling Age at MRI                  | 43.653   | (41.59, 45.71)     | 369 | <0.001               |
| <b>Left Cuneus</b>                  |          |                    |     |                      |
| Intercept                           | 1087.363 | (1040.21, 1134.52) | 369 | <0.001               |
| Proband SCQ                         | 1.905    | (-1.62, 5.43)      | 267 | 0.288                |
| Sibling Sex - Male                  | 83.145   | (44.29, 122)       | 267 | <0.001               |
| Sibling Group - ASD                 | -21.744  | (-73.65, 30.17)    | 267 | 0.41                 |
| Group x Proband SCQ                 | 6.674    | (-3.2, 16.55)      | 267 | 0.184                |
| Group x Age at MRI                  | 0.391    | (-1.56, 2.34)      | 369 | 0.693                |
| Site - 2                            | 27.956   | (-27.82, 83.73)    | 267 | 0.325                |
| Site - 3                            | -11.46   | (-62.73, 39.81)    | 267 | 0.66                 |
| Site - 4                            | 14.398   | (-40.35, 69.14)    | 267 | 0.605                |
| Sibling Age at MRI                  | 13.284   | (12.44, 14.13)     | 369 | <0.001               |
| <b>Right Lingual Gyrus</b>          |          |                    |     |                      |
| Intercept                           | 641.904  | (601.98, 681.83)   | 369 | <0.001               |
| Proband SCQ                         | -0.77    | (-3.74, 2.2)       | 267 | 0.611                |
| Sibling Sex - Male                  | 57.514   | (24.72, 90.31)     | 267 | <0.001               |
| Sibling Group - ASD                 | 56.097   | (11.37, 100.82)    | 267 | 0.014                |
| Group x Proband SCQ                 | 10.882   | (2.56, 19.21)      | 267 | 0.011                |
| Group x Age at MRI                  | -0.613   | (-2.39, 1.17)      | 369 | 0.499                |
| Site - 2                            | -2.645   | (-49.71, 44.42)    | 267 | 0.912                |
| Site - 3                            | 7.27     | (-35.98, 50.52)    | 267 | 0.741                |
| Site - 4                            | 11.939   | (-34.24, 58.12)    | 267 | 0.611                |
| Sibling Age at MRI                  | 8.682    | (7.91, 9.45)       | 369 | <0.001               |
| <b>Right Middle Occipital Gyrus</b> |          |                    |     |                      |
| Intercept                           | 1226.628 | (1152.15, 1301.1)  | 369 | <0.001               |
| Proband SCQ                         | -6.369   | (-11.94, -0.8)     | 267 | 0.025                |
| Sibling Sex - Male                  | 137.273  | (75.91, 198.63)    | 267 | <0.001               |
| Sibling Group - ASD                 | -56.767  | (-138.19, 24.66)   | 267 | 0.171                |
| Group x Proband SCQ                 | 26.821   | (11.15, 42.5)      | 267 | <0.001               |
| Group x Age at MRI                  | 0.143    | (-3.21, 3.5)       | 369 | 0.933                |
| Site - 2                            | 5.894    | (-82.17, 93.95)    | 267 | 0.895                |
| Site - 3                            | -8.002   | (-88.95, 72.95)    | 267 | 0.846                |
| Site - 4                            | -13.116  | (-99.56, 73.33)    | 267 | 0.765                |
| Sibling Age at MRI                  | 25.161   | (23.69, 26.63)     | 369 | <0.001               |

<sup>a</sup>Bonferroni correction applied to the Group x Proband SCQ effect of interest

\* = p-values < 0.01(0.05/5).

**TABLE S11. Linear Mixed Model Results Including Time Interaction Term for Splenium FA**

|                       | Estimate | 95% CI              | df  | P value |
|-----------------------|----------|---------------------|-----|---------|
| <b>CC Splenium</b>    |          |                     |     |         |
| Intercept             | 0.46852  | (0.45923, 0.47781)  | 295 | <0.001  |
| Proband SCQ           | 0.00015  | (-0.0007, 0.001)    | 280 | 0.734   |
| Sibling Sex - Male    | 0.00426  | (-0.00337, 0.01188) | 280 | 0.273   |
| Sibling Group - ASD   | -0.01093 | (-0.02251, 0.00066) | 280 | 0.064   |
| Group x Proband SCQ   | 0.00172  | (-0.0004, 0.00383)  | 280 | 0.111   |
| Group x Age MRI       | 0.00023  | (-0.00053, 0.00099) | 295 | 0.55    |
| Proband SCQ x Age MRI | 0.00003  | (-0.00005, 0.00008) | 295 | 0.35    |
| Group x SCQ x Age MRI | -0.00014 | (-0.00029, 0.00001) | 295 | 0.062   |
| Site - 2              | -0.00092 | (-0.01184, 0.01001) | 280 | 0.869   |
| Site - 3              | -0.01767 | (-0.02744, -0.0079) | 280 | <0.001  |
| Site - 4              | 0.00114  | (-0.00917, 0.01145) | 280 | 0.828   |
| Sibling Age at MRI    | 0.00414  | (0.00382, 0.00445)  | 295 | <0.001  |

**TABLE S12. fcMRI Enrichment Results Table**

| Network 1 | Network 2 | SCQ P-value | ADI-R P-value | Vineland Soc P-value |
|-----------|-----------|-------------|---------------|----------------------|
| pDMN      | VIS       |             | 0.0097        | 0.0012               |
| pDMN      | mVIS      |             |               | 0.0094               |
| pDMN      | SM1       |             | 0.0031        |                      |
| pFP       | VIS       | 0.0077      |               |                      |

## REFERENCES

1. Hazlett HC, Gu H, Munsell BC, et al.: Early brain development in infants at high risk for autism spectrum disorder. *Nature* 2017; 542:348–351
2. Hazlett HC, Gu H, McKinstry RC, et al.: Brain volume findings in 6-month-old infants at high familial risk for autism. *The American journal of psychiatry* 2012; 169:601–608
3. Wang JY, Hagerman RJ, Rivera SM: A multimodal imaging analysis of subcortical gray matter in fragile X premutation carriers. *Mov Disord Official J Mov Disord Soc* 2013; 28:1278–84
4. Tzourio-Mazoyer N, Landeau B, Papathanassiou D, et al.: Automated anatomical labeling of activations in SPM using a macroscopic anatomical parcellation of the MNI MRI single-subject brain. *NeuroImage* 2002; 15:273–289
5. Kim SH, Fonov VS, Dietrich C, et al.: Adaptive prior probability and spatial temporal intensity change estimation for segmentation of the one-year-old human brain. *J Neurosci Meth* 2012; 212:43–55
6. Shen MD, Kim SH, McKinstry RC, et al.: Increased Extra-axial Cerebrospinal Fluid in High-Risk Infants Who Later Develop Autism. *Biological psychiatry* 2017; 82:186–193
7. Sled JG, Zijdenbos AP, Evans AC: A nonparametric method for automatic correction of intensity nonuniformity in MRI data. *Ieee T Med Imaging* 2020; 17:87–97
8. Collins DL, Neelin P, Peters TM, et al.: Automatic 3D Intersubject Registration of MR Volumetric Data in Standardized Talairach Space. *J Comput Assist Tomo* 1994; 18:192–205
9. Smith SM: Fast robust automated brain extraction. *Human brain mapping* 2002; 17:143–155
10. Gouttard S, Styner M, Joshi S, et al.: Subcortical structure segmentation using probabilistic atlas priors 2007; 65122J
11. Oguz I, Farzinfar M, Matsui J, et al.: DTIPrep: quality control of diffusion-weighted images. *Frontiers in neuroinformatics* 2014; 8:4
12. Wolff JJ, Swanson MR, Elison JT, et al.: Neural circuitry at age 6 months associated with later repetitive behavior and sensory responsiveness in autism. *Molecular autism* 2017; 8:8
13. Verde AR, Budin F, Berger J-B, et al.: UNC-Utah NA-MIC framework for DTI fiber tract analysis. *Frontiers in neuroinformatics* 2014; 7:51
14. Eggebrecht AT, Elison JT, Feczko E, et al.: Joint Attention and Brain Functional Connectivity in Infants and Toddlers. *Cerebral cortex (New York, NY : 1991)* 2017; 27:1709–1720
15. Emerson RW, Gao W, Lin W: Longitudinal Study of the Emerging Functional Connectivity Asymmetry of Primary Language Regions during Infancy. *The Journal of neuroscience : the official journal of the Society for Neuroscience* 2016; 36:10883–10892
16. Ojemann JG, Akbudak E, Snyder AZ, et al.: Anatomic Localization and Quantitative Analysis of Gradient Refocused Echo-Planar fMRI Susceptibility Artifacts. *NeuroImage* 1997; 6:156–167
17. Power JD, Mitra A, Laumann TO, et al.: Methods to detect, characterize, and remove motion artifact in resting state fMRI. *NeuroImage* 2014; 84:320–341
18. Nielsen AN, Greene DJ, Gratton C, et al.: Evaluating the Prediction of Brain Maturity From Functional Connectivity After Motion Artifact Denoising. *Cereb Cortex* 2018; 29:2455–2469
19. Pruett JR, Kandala S, Hoertel S, et al.: Accurate age classification of 6 and 12 month-old infants based on resting-state functional connectivity magnetic resonance imaging data. *Developmental cognitive neuroscience* 2015; 12:123–133

20. Dosenbach NUF, Fair DA, Miezin FM, et al.: Distinct brain networks for adaptive and stable task control in humans. *Proc National Acad Sci* 2007; 104:11073–11078
21. Marek S, Dosenbach NUF: The frontoparietal network: function, electrophysiology, and importance of individual precision mapping. *Dialogues Clin Neurosci* 2018; 20:133–140
22. Nair A, Jolliffe M, Lograsso YSS, et al.: A Review of Default Mode Network Connectivity and Its Association With Social Cognition in Adolescents With Autism Spectrum Disorder and Early-Onset Psychosis. *Frontiers Psychiatry* 2020; 11:614
23. Rosvall M, Bergstrom CT: Maps of random walks on complex networks reveal community structure. *Proc National Acad Sci* 2008; 105:1118–1123
24. Seitzman BA, Gratton C, Marek S, et al.: A set of functionally-defined brain regions with improved representation of the subcortex and cerebellum. *Neuroimage* 2020; 206:116290
25. Benjamini Y, Hochberg Y: Controlling the false discovery rate: a practical and powerful approach to multiple testing [Internet]. *Journal of the Royal Statistical Society* 1995; 57:289–300 Available from: <http://www.jstor.org/stable/2346101>
26. Verbeke G, Verbeke G, Molenberghs G: *Linear Mixed Models for Longitudinal Data* [Internet] New York, NY, Springer New York, 1997, pp 63–153. Available from: [https://doi.org/10.1007/978-1-4612-2294-1\\_3](https://doi.org/10.1007/978-1-4612-2294-1_3)
27. Fitzmaurice GM, Laird NM, Ware JH: *Applied Longitudinal Analysis*. Wiley Ser Probab Statistics 2018; 441–472
28. Girault JB, Swanson MR, Meera SS, et al.: Quantitative trait variation in ASD probands and toddler sibling outcomes at 24 months. *Journal of neurodevelopmental disorders* 2020; 12:5
29. Rutter M, Couteur AL, Lord C: *Autism diagnostic interview-revised*. Western Psychological Services, 2003
30. Rolison M, Lacadie C, Chawarska K, et al.: Atypical Intrinsic Hemispheric Interaction Associated with Autism Spectrum Disorder Is Present within the First Year of Life. *Cereb Cortex New York N Y* 1991 2021;
31. Marrus N, Eggebrecht AT, Todorov A, et al.: Walking, Gross Motor Development, and Brain Functional Connectivity in Infants and Toddlers. *Cerebral Cortex* 2018; 28:750–763
